# Supplementary material for: The important role of surface charge on a new mechanism of nitrogen reduction
Source: Royal Society of Chemistry journal article supplement (doi:10.1039/d2cp05485j), 2023-01-01
Supplement: d2cp05485j1.pdf [file d2cp05485j1.pdf]

## Supporting information

# Important role of surface charge on new mechanism of nitrogen reduction

Shuang Wu<sup>a,b</sup>, Huijie Liu<sup>a</sup>, Mengnan Qu<sup>a</sup>, Aijun Du<sup>c</sup>, Jianfen Fan<sup>\*b</sup> and Qiao Sun<sup>\*a</sup>

<sup>a</sup> State Key Laboratory of Radiation Medicine and Protection, Collaborative Innovation Centre of Radiation Medicine of Jiangsu Higher Education Institutions, School for Radiological and Interdisciplinary Sciences, Soochow University, Suzhou 215123, China. E-mail: [sunqiao@suda.edu.cn](mailto:sunqiao@suda.edu.cn)

<sup>b</sup> College of Chemistry, Chemical Engineering and Materials Science, Soochow University, Suzhou 215123, People's Republic of China. E-mail: [jffan@suda.edu.cn](mailto:jffan@suda.edu.cn)

<sup>c</sup> School of Chemistry, Physics and Mechanical Engineering, Queensland University of Technology, Brisbane, QLD 4001, Australia

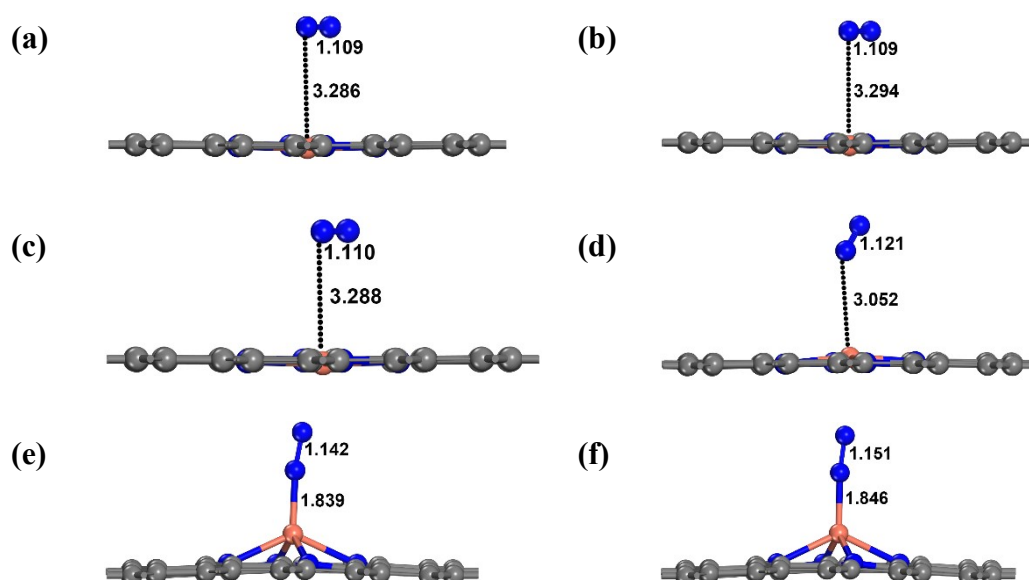

**Fig. S1.** Side views of the adsorption configurations of  $N_2$  on Cu-N<sub>4</sub>-graphene under the charge densities of -0.38 (a), -0.75 (b), -1.13 (c), -1.51 (d), -1.88 (e) and  $-2.26 \times 10^{14}$  (f)  $e \cdot cm^{-2}$ . Data in the figure refer to the atomic distances in Å.

**Table S1** Results of  $E_{\text{ZPE}}$  and TS obtained from vibration computations for all adsorbates

| Species             | $E_{\text{ZPE}}$ (eV) | TS (eV) |
|---------------------|-----------------------|---------|
| *                   | 0.59                  | 1.04    |
| *N <sub>2</sub>     | 0.67                  | 1.18    |
| *NNH                | 0.67                  | 1.15    |
| *NHNH               | 0.68                  | 1.21    |
| *NNH <sub>2</sub>   | 0.67                  | 1.16    |
| *N-NH <sub>3</sub>  | 0.71                  | 1.27    |
| *N                  | 0.64                  | 1.12    |
| *NHNH <sub>2</sub>  | 0.69                  | 1.22    |
| *NH-NH <sub>3</sub> | 0.74                  | 1.35    |
| *NH                 | 0.64                  | 1.10    |
| *NH <sub>2</sub>    | 0.67                  | 1.16    |
| *NH <sub>3</sub>    | 0.68                  | 1.23    |

Notes:  $E_{\text{ZPE}}$  stands for zero point energy and TS represents the product of temperature and entropy. “\*” represents the chemisorbed species.

**Table S2** Mulliken net charges (e) on N<sub>2</sub>, Cu, the N<sub>4</sub> and Cu-N<sub>4</sub> clusters, and the Cu-N<sub>4</sub>-graphene substrate in the optimized configurations of N<sub>2</sub> adsorption on Cu-N<sub>4</sub>-graphene under different surface charges

|     | Charge density                         | Mulliken net charge (e) |       |                |                   |                             |
|-----|----------------------------------------|-------------------------|-------|----------------|-------------------|-----------------------------|
|     | (10 <sup>14</sup> e·cm <sup>-2</sup> ) | N <sub>2</sub>          | Cu    | N <sub>4</sub> | Cu-N <sub>4</sub> | Cu-N <sub>4</sub> -graphene |
| 0.0 | 0.00                                   | 0.009                   | 0.414 | -1.472         | -1.058            | -0.009                      |
| 0.5 | -3.77                                  | 0.004                   | 0.385 | -1.521         | -1.136            | -0.504                      |
| 1.0 | -7.53                                  | -0.002                  | 0.359 | -1.938         | -1.579            | -0.999                      |
| 1.5 | -1.13                                  | -0.018                  | 0.335 | -1.953         | -1.618            | -1.484                      |
| 2.0 | -1.51                                  | -0.140                  | 0.414 | -1.495         | -1.081            | -1.857                      |
| 2.5 | -1.88                                  | -0.254                  | 0.414 | -1.511         | -1.097            | -2.248                      |
| 3.0 | -2.26                                  | -0.352                  | 0.414 | -1.925         | -1.511            | -2.645                      |

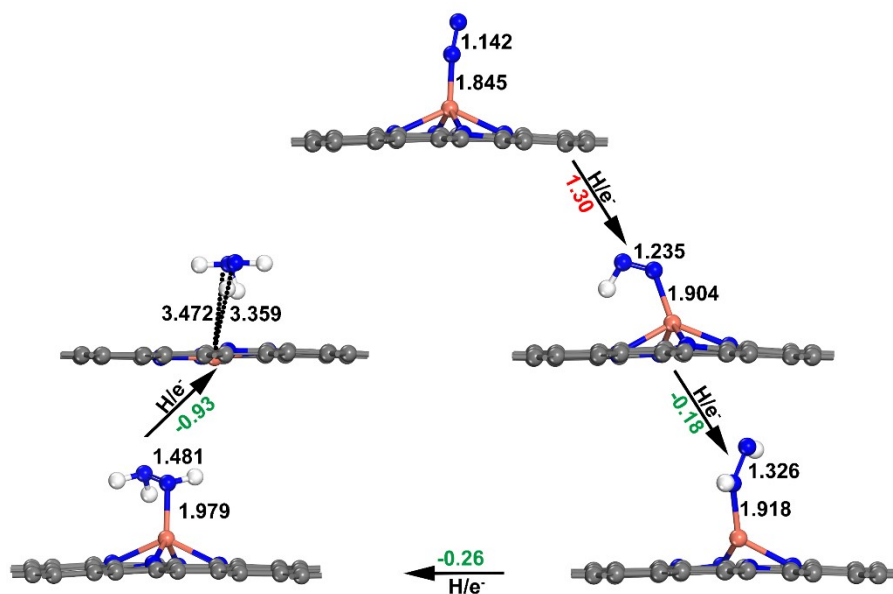

**Fig. S2.** Side views of the optimized configurations formed in individual hydrogenation processes of NRR under a charge density of  $-1.88 \times 10^{14} \text{ e} \cdot \text{cm}^{-2}$ , finally forming hydrazine— $\text{NH}_2\text{NH}_2$ . Data in black represent the bond lengths in Å. Those in red and green refer the changes of Gibbs free energy ( $\Delta G$ , eV) of individual hydrogenation steps (red, endothermic; green, exothermic)

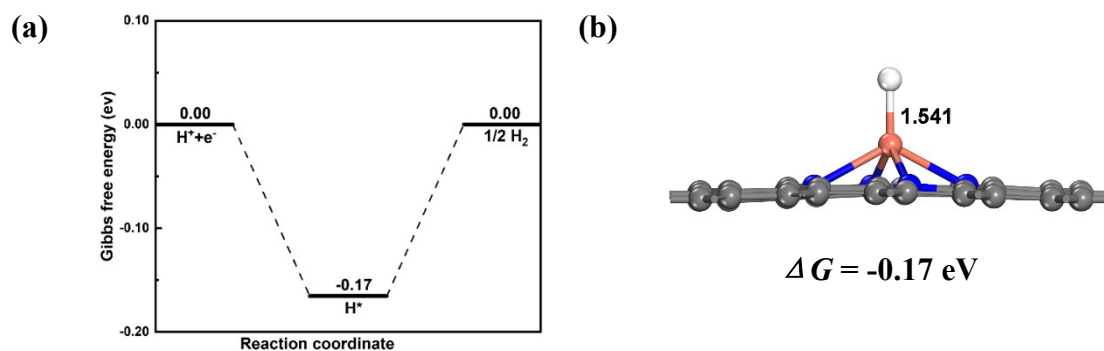

**Fig. S3.** Gibbs free energy profile (a) and the side view of the optimized configuration (b) of H adsorption on Cu-N<sub>4</sub>-graphene under a surface charge density of  $-1.88 \times 10^{14} \text{ e} \cdot \text{cm}^{-2}$ . The bond length is labeled in Å.  $\Delta G$  refers the change of Gibbs free energy of H adsorbed on Cu-N<sub>4</sub>-graphene.
